# Supplementary material for: GMMA as an Alternative Carrier for a Glycoconjugate Vaccine against Group A Streptococcus
Source: MDPI journal article supplement (doi:10.3390/vaccines10071034), 2022-06-28
Supplement: s1 [file s1]

# GMMA as an Alternative Carrier for a Glycoconjugate Vaccine against Group A *Streptococcus*

Elena Palmieri <sup>1</sup>, Zoltán Kis <sup>2,3</sup>, James Ozanne <sup>4</sup>, Roberta Di Benedetto <sup>1</sup>, Beatrice Ricchetti <sup>1</sup>, Luisa Massai <sup>1</sup>, Martina Carducci <sup>1</sup>, Davide Oldrini <sup>1</sup>, Gianmarco Gasperini <sup>1</sup>, Maria Grazia Aruta <sup>1</sup>, Omar Rossi <sup>1</sup>, Cleo Kontoravdi <sup>2</sup>, Nilay Shah <sup>2</sup>, Fatme Mawas <sup>4</sup>, Francesca Micoli <sup>1,\*</sup>

<sup>1</sup> GSK Vaccines Institute for Global Health (GVGH), Via Fiorentina 1, 53100 Siena, Italy; elena.x.palmieri@gsk.com (E.P.); roberta.x.di-benedetto@gsk.com (R.D.B.); beatrice.x.ricchetti@gsk.com (B.R.); luisa.x.massai@gsk.com (L.M.); martina.x.carducci@gsk.com (M.C.); davide.x.oldrini@gsk.com (D.O.); gianmarco.x.gasperini@gsk.com (G.G.); maria-grazia.x.aruta@gsk.com (M.G.A.); omar.x.rossi@gsk.com (O.R.)

<sup>2</sup> The Sargent Centre for Process Systems Engineering, Department of Chemical Engineering, Imperial College London, South Kensington Campus, London SW7 2AZ, UK; cleo.kontoravdi98@imperial.ac.uk (C.K.); n.shah@imperial.ac.uk (N.S.)

<sup>3</sup> Department of Chemical and Biological Engineering, The University of Sheffield, Mappin Street, Sheffield S1 3JD, UK; z.kis@sheffield.ac.uk (Z.K.)

<sup>4</sup> The National Institute for Biological Standards and Control (NIBSC), South Mimms EN6 3QG, UK; James.Ozanne@nibsc.org (J.O.); Fatme.Mawas@nibsc.org (F.M.)

\* Correspondence: francesca.x.micoli@gsk.com; Tel.: +39-0577-539087

**Supplementary Table S1.** Input parameters and assumptions used for techno-economic modelling in SuperPro Designer.

| Parameter use     | Parameter class    | Parameter name                              | Value | Unit           |
|-------------------|--------------------|---------------------------------------------|-------|----------------|
| CapEx calculation | Direct Cost (DC)   | Piping Cost                                 | 35    | % of TEPC      |
|                   |                    | Instrumentation Cost                        | 40    | % of TEPC      |
|                   |                    | Insulation Cost                             | 03    | % of TEPC      |
|                   |                    | Electrical Facilities Cost                  | 10    | % of TEPC      |
|                   |                    | Buildings Cost                              | 250   | % of TEPC      |
|                   |                    | Yard Improvement Cost                       | 15    | % of TEPC      |
|                   |                    | Auxiliary Facilities Cost                   | 40    | % of TEPC      |
|                   |                    | Unlisted Equipment Purchase Cost (UEPC)     | 30    | % of TEPC      |
|                   |                    | Unlisted Equipment Installation Cost        | 50    | % of UEPC      |
|                   | Indirect Cost (IC) | Engineering Cost                            | 25    | % of DC        |
|                   |                    | Construction Cost                           | 35    | % of DC        |
|                   | Other Cost (OC)    | Contractor's Fee                            | 5     | % of (IC + DC) |
|                   |                    | Contingency                                 | 10    | % of (IC + DC) |
|                   | Miscellaneous      | Working Capital – to cover expenses for     | 30    | days           |
|                   |                    | Start-up and Validation Costs               | 30    | % of DFC       |
|                   |                    | Up front R&D                                | 0     | US\$           |
|                   |                    | Up front royalties                          | 0     | US\$           |
|                   |                    | Maintenance: equipment specific multipliers |       |                |

|                             |                    |                                                                              |      |                             |
|-----------------------------|--------------------|------------------------------------------------------------------------------|------|-----------------------------|
| OpEx calculation            | Facility dependent | Depreciation: contribution from each equipment's undepreciated purchase cost |      |                             |
|                             |                    | Insurance                                                                    | 1    | % of DFC                    |
|                             |                    | Local taxes                                                                  | 2    | % of DFC                    |
|                             |                    | Factory expenses                                                             | 5    | % of DFC                    |
|                             | Labour             | Basic operator labour rate (BOLR)                                            | 22   | USD × hour <sup>-1</sup>    |
|                             |                    | Benefits factor                                                              | 40   | % of BOLR                   |
|                             |                    | Operating supplies factor                                                    | 10   | % of BOLR                   |
|                             |                    | Supervision factor                                                           | 20   | % of BOLR                   |
|                             |                    | Administration factor                                                        | 60   | % of BOLR                   |
|                             |                    | Lumped operator labour rate                                                  | 75   | USD × hour <sup>-1</sup>    |
|                             |                    | Adjusted basic operator labour rate*                                         | 50.6 | USD × hour <sup>-1</sup>    |
|                             |                    | Direct labour time utilisation - batch                                       | 60   | %                           |
|                             |                    | Direct labour time utilisation - continuous                                  | 70   | %                           |
|                             | Lab, QC, QA        | Laboratory, quality control, quality assurance                               | 15   | % TLC                       |
|                             | Utilities          | Standard electricity                                                         | 0.1  | US\$ × (kW×h) <sup>-1</sup> |
|                             |                    | Chilled water                                                                | 0.4  | US\$ × tonne <sup>-1</sup>  |
|                             |                    | Cooled water                                                                 | 0.1  | US\$ × tonne <sup>-1</sup>  |
|                             |                    | Steam                                                                        | 12   | US\$ × tonne <sup>-1</sup>  |
|                             | Miscellaneous      | Fixed R&D                                                                    | 0    | US\$ × year <sup>-1</sup>   |
|                             |                    | Variable R&D                                                                 | 0    | US\$ × g MP <sup>-1</sup>   |
|                             |                    | On-going process validation                                                  | 0    | US\$ × year <sup>-1</sup>   |
|                             |                    | Other fixed                                                                  | 0    | US\$ × year <sup>-1</sup>   |
|                             |                    | Other variable                                                               | 0    | US\$ × g MP <sup>-1</sup>   |
| Overall economic evaluation | Time valuation     | Construction period                                                          | 20   | months                      |
|                             |                    | Start-up period                                                              | 4    | months                      |
|                             |                    | Project lifetime                                                             | 20   | years                       |
|                             |                    | Inflation                                                                    | 4    | %                           |
|                             |                    | NPV interest - Low                                                           | 7    | %                           |
|                             |                    | NPV interest - Medium                                                        | 9    | %                           |
|                             |                    | NPV interest - High                                                          | 11   | %                           |
|                             | Financing          | Loan interest for DFC                                                        | 9    | %                           |
|                             |                    | Loan interest for working capital                                            | 12   | %                           |
|                             |                    | Loan interest for up front R&D                                               | 12   | %                           |
|                             |                    | Loan interest for up front royalties                                         | 12   | %                           |
|                             |                    | Loan period for DFC                                                          | 10   | years                       |
|                             |                    | Loan period for working capital                                              | 6    | years                       |
|                             |                    | Loan period for up front R&D                                                 | 6    | years                       |
|                             |                    | Loan period for up front royalties                                           | 6    | years                       |
|                             |                    | DFC outlay for 1 <sup>st</sup> year                                          | 30   | % of DFC                    |
|                             |                    | DFC outlay for 2 <sup>nd</sup> year                                          | 40   | % of DFC                    |
|                             |                    | DFC outlay for 3 <sup>rd</sup> year                                          | 30   | % of DFC                    |
|                             |                    | DFC outlay for 4 <sup>th</sup> year                                          | 0    | % of DFC                    |
|                             |                    | DFC outlay for 5 <sup>th</sup> year                                          | 0    | % of DFC                    |
|                             |                    | Straight line depreciation period                                            | 10   | years                       |
|                             |                    | Salvage value                                                                | 5    | % of DFC                    |
|                             | Production level   | Operating capacity for each year                                             | 100  | %                           |
|                             |                    | Product failure rate                                                         | 5    | %                           |

|  |               |                                           |    |                           |
|--|---------------|-------------------------------------------|----|---------------------------|
|  |               | Disposal cost                             | 0  | US\$ × g MP <sup>-1</sup> |
|  | Miscellaneous | Income tax                                | 40 | %                         |
|  |               | Fixed advertising and selling expenses    | 0  | US\$ × year <sup>-1</sup> |
|  |               | Variable advertising and selling expenses | 0  | US\$ × g MP <sup>-1</sup> |
|  |               | Variable running royalty expenses         | 0  | US\$ × g MP <sup>-1</sup> |

Abbreviations used in Supplementary Table 3: CapEx – capital expenditure; OpEx – operating expense; TEPC – total equipment purchase cost; UEPC – unlisted equipment purchase cost; DFC – direct fixed capital; DC – direct cost; IC – indirect cost; OC – other cost; TLC – total labour costs; BOLR – basic operator labour rate; g MP – gram of main product.

\*calculated based on benefits, operating supplies, supervision cost and administration cost.
